# Supplementary material for: A novel core–double shell heterostructure derived from a metal–organic framework for efficient HER, OER and ORR electrocatalysis
Source: Royal Society of Chemistry journal article supplement (doi:10.1039/c9qi01080g), 2019-10-25
Supplement: c9qi01080g1.pdf [file c9qi01080g1.pdf]

Electronic Supplementary Information (ESI)

**A Novel Core-double Shell Heterostructure Derived from Metal-Organic Framework for  
Efficient HER, OER and ORR Electrocatalysis**

Jing Li,<sup>a</sup> Guangshe Li,<sup>a</sup> Jianghao Wang,<sup>a</sup> Chenglin Xue,<sup>a</sup> Xiangshuai Li,<sup>a</sup> Shuo Wang,<sup>a</sup> Bingqi Han,<sup>a</sup>

Min Yang<sup>a</sup> and Liping Li<sup>\*a</sup>

<sup>a</sup>State Key Laboratory of Inorganic Synthesis and Preparative Chemistry, College of Chemistry,  
Jilin University, Changchun 130012, PR China.

\*E-mail: lipingli@jlu.edu.cn (L. Li)

## Content

|                                                                                                                                                  |   |
|--------------------------------------------------------------------------------------------------------------------------------------------------|---|
| 1. Experimental section.....                                                                                                                     | 3 |
| 1.1 Chemicals.....                                                                                                                               | 3 |
| 1.2 Preparation of Co-Based Metal-Organic Framework ZIF-67: .....                                                                                | 3 |
| 1.3 Preparation of hollow structure of ZIF-67@CoS: .....                                                                                         | 3 |
| 1.4 Preparation of Co@Co <sub>9</sub> S <sub>8</sub> nanostructure: .....                                                                        | 3 |
| 1.5 Preparation of Co <sub>9</sub> S <sub>8</sub> @Co <sub>9</sub> S <sub>8</sub> @ MoS <sub>2</sub> -x (x=0.5, 2.0, 4.0) heterostructure: ..... | 3 |
| 1.6 Preparation of MoS <sub>2</sub> .....                                                                                                        | 4 |
| 1.7 Preparation of Cobalt phase .....                                                                                                            | 4 |
| 1.8 Preparation of Co <sub>9</sub> S <sub>8</sub> @Co <sub>9</sub> S <sub>8</sub> @MoS <sub>2</sub> -x-mix (x= 0.5, 2.0 and 4.0) .....           | 4 |
| 2. Instruments.....                                                                                                                              | 5 |
| 3. Electrochemical Measurements .....                                                                                                            | 5 |
| 3.1 HER and OER Measurements: .....                                                                                                              | 5 |
| 3.2 ORR Measurements: .....                                                                                                                      | 6 |
| 4. Characterizations .....                                                                                                                       | 8 |

## **1. Experimental section**

### **1.1 Chemicals**

Cobalt (II) nitrate hexahydrate ( $\text{Co}(\text{NO}_3)_2 \cdot 6\text{H}_2\text{O}$ ), sodium molybdate dehydrate ( $(\text{NH}_4)_2\text{MoO}_4 \cdot 2\text{H}_2\text{O}$ ) from Sinopharm Chemical Reagents Co., Ltd, 2-methylimidazole from Innochem and thioacetamide was purchased from Alfa Aesar. All chemicals were used as received.

### **1.2 Preparation of Co-Based Metal-Organic Framework ZIF-67:**

Cobalt nitrate hexahydrate (1.116 g) and 2-methylimidazole (1.312 g) were dissolved in 30 mL and 10 mL methanol, respectively. Then, the above two solutions were mixed rapidly under fast stirring for 5 min. The obtained suspension was aged for 12 h at room temperature. After that, the precipitate was washed for 3 times by methanol and collected by centrifugation. Finally, the product was dried in vacuum at 80 °C overnight.

### **1.3 Preparation of hollow structure of ZIF-67@CoS:**

50 mg of ZIF-67 was dispersed in 40 mL of ethanol and the suspension was ultrasonic for 10 min. Then, 50 mg of thioacetamide (TAA) was added and refluxed at 90 °C for 18 min. After that, the as-obtained product was washed by ethanol for at least 3 times and then dried in vacuum at 60 °C overnight.

### **1.4 Preparation of Co@Co<sub>9</sub>S<sub>8</sub> nanostructure:**

20 mg as-obtained ZIF-67@CoS was annealed in argon atmosphere at 900 °C for 100 min with a ramp rate of 1 °C min<sup>-1</sup>.

### 1.5 Preparation of Co<sub>9</sub>S<sub>8</sub>@Co<sub>9</sub>S<sub>8</sub>@ MoS<sub>2</sub>-x (x=0.5, 2.0, 4.0) heterostructure:

Co<sub>9</sub>S<sub>8</sub>@Co<sub>9</sub>S<sub>8</sub>@MoS<sub>2</sub>-0.5 was synthesized by hydrothermal method. 15 mg Co@Co<sub>9</sub>S<sub>8</sub>, 7.5 mg sodium molybdate dihydrate and 180 mg L-cysteine was dispersed in 30 mL deionized water. After 15 minutes of ultrasonic dispersion, the mixture then reacted in Teflon-lined stainless steel autoclave of 100 mL at 200 °C for 20 h. Afterwards, the black product was washed by deionized water and ethanol for 5 times and vacuum dried overnight. Finally, the as-obtained product was annealed in Ar/H<sub>2</sub> for 4 h with a ramp rate of 2 °C min<sup>-1</sup>. The preparation methods of Co<sub>9</sub>S<sub>8</sub>@Co<sub>9</sub>S<sub>8</sub>@MoS<sub>2</sub>-x (x= 2.0 and 4.0) are similar except that the mass of sodium molybdate dihydrate in Co<sub>9</sub>S<sub>8</sub>@Co<sub>9</sub>S<sub>8</sub>@MoS<sub>2</sub>-2.0 and Co<sub>9</sub>S<sub>8</sub>@Co<sub>9</sub>S<sub>8</sub>@MoS<sub>2</sub>-4.0 is 30 mg and 60 mg respectively, where x is the value of MoS<sub>2</sub> mass divide by Co@Co<sub>9</sub>S<sub>8</sub> mass. “x” in Co<sub>9</sub>S<sub>8</sub>@Co<sub>9</sub>S<sub>8</sub>@MoS<sub>2</sub>-x represents mass fraction of m(Na<sub>2</sub>MoO<sub>4</sub>·2H<sub>2</sub>O)/m(Co@Co<sub>9</sub>S<sub>8</sub>).

### 1.6 Preparation of MoS<sub>2</sub>

MoS<sub>2</sub> was synthesized by hydrothermal method. 60 mg sodium molybdate dihydrate and 180 mg L-cysteine was dispersed in 30 mL deionized water. Before reacting in Teflon-lined stainless steel autoclave of 100 mL at 200 °C for 20 h, the solution should be ultrasonic dispersed for 15 minutes. Afterwards, the black product was washed by deionized water and ethanol for 5 times and vacuum dried overnight. Finally, the as-prepared sample was annealed in Ar/H<sub>2</sub> for 4 h with a ramp rate of 2 °C min<sup>-1</sup>.

### 1.7 Preparation of Cobalt phase

20 mg of as-prepared ZIF-67 was annealed in argon atmosphere at 900 °C for 100 min with a ramp rate of 1 °C min<sup>-1</sup> to obtain Cobalt phase.

### 1.8 Preparation of Co<sub>9</sub>S<sub>8</sub>@Co<sub>9</sub>S<sub>8</sub>@MoS<sub>2</sub>-x-mix (x= 0.5, 2.0 and 4.0)

According to results of XRF, we physically mixed Co<sub>9</sub>S<sub>8</sub>@Co<sub>9</sub>S<sub>8</sub> and MoS<sub>2</sub> to prepare Co<sub>9</sub>S<sub>8</sub>@Co<sub>9</sub>S<sub>8</sub>@MoS<sub>2</sub>-0.5-mix, Co<sub>9</sub>S<sub>8</sub>@Co<sub>9</sub>S<sub>8</sub>@MoS<sub>2</sub>-2.0-mix and Co<sub>9</sub>S<sub>8</sub>@Co<sub>9</sub>S<sub>8</sub>@MoS<sub>2</sub>-4.0-mix,

which share the same molar ratios of  $n(\text{Co}_9\text{S}_8)/n(\text{MoS}_2)$  with  $\text{Co}_9\text{S}_8@\text{Co}_9\text{S}_8@\text{MoS}_2\text{-0.5}$ ,  $\text{Co}_9\text{S}_8@\text{Co}_9\text{S}_8@\text{MoS}_2\text{-2.0}$  and  $\text{Co}_9\text{S}_8@\text{Co}_9\text{S}_8@\text{MoS}_2\text{-4.0}$ , respectively. In specifically,  $\text{Co}_9\text{S}_8@\text{Co}_9\text{S}_8@\text{MoS}_2\text{-0.5-mix}$  was prepared by physically mixing 0.96 mg  $\text{MoS}_2$  with 7.68 mg  $\text{Co}_9\text{S}_8@\text{Co}_9\text{S}_8$ . Similarly, 3.36 mg  $\text{MoS}_2$  and 4.64 mg  $\text{Co}_9\text{S}_8@\text{Co}_9\text{S}_8$  were mixed in  $\text{Co}_9\text{S}_8@\text{Co}_9\text{S}_8@\text{MoS}_2\text{-2.0-mix}$ , 3.76 mg  $\text{MoS}_2$  and 4.24 mg  $\text{Co}_9\text{S}_8@\text{Co}_9\text{S}_8$  in  $\text{Co}_9\text{S}_8@\text{Co}_9\text{S}_8@\text{MoS}_2\text{-4.0-mix}$ . To express more simple, four samples were named as CCM-x-mix ( $x=0.5, 2.0$  and  $4.0$ ).

## 2. Instruments

The powder x-ray diffraction (XRD) patterns were recorded on Rigaku Miniflex apparatus ( $\text{Cu K}\alpha$ ,  $\lambda=1.5418 \text{ \AA}$ ). Scanning electron microscope (SEM) images were characterized using a JSM-6700F. Transmission electron microscopy (TEM), high-angle annular dark field scanning transmission electron microscopy (HAADF STEM) and energy dispersive X-ray spectrometer (EDS) mappings were performed using a Tecnai G2S-Twin F20 apparatus. Chemical compositions were determined with an X-ray fluorescence (XRF) spectrometer (PANalytical, AXIOS). X-ray photoelectron spectroscopy (XPS) spectra were performed on an ESCALAB 250 spectrometer with  $\text{Mg K}\alpha$  radiation. We used C 1s photoemission line at binding energy of 284.6 eV to calibrate all the spectra. Raman spectra were taken at a laser excitation of 532 nm on a Renishaw INVIA Confocal Raman spectrometer. A TriStar 3000 (Micromeritics) nitrogen adsorption apparatus at 77 K were used to record the adsorption-desorption isotherms of  $\text{N}_2$  for samples. X-ray absorption near-edge structure (XANES) of S K-edge was performed at the BL12B-a beamline of the National Synchrotron Radiation Laboratory (NSRL).

## 3. Electrochemical Measurements

### 3.1 HER and OER Measurements:

Electrochemical measurements were performed in a three-electrode system in conjunction with a CHI 760E workstation (CH Instruments, Inc., Shanghai, China) at room temperature, using  $\text{Ag}/\text{AgCl}$  ( $\text{KCl}$ , saturated) electrode as the reference electrode, graphite as the counter electrode and glassy carbon electrode of 5 mm diameter (GC) as the working electrode. The GCE was

polished with alpha aluminium oxide powder of 50 nm and washed with deionized water before used. All the potentials were converted to reversible hydrogen electrode (RHE) according to the equation:  $E(\text{RHE}) = E(\text{Ag/AgCl}) + 0.059 \text{ pH} + 0.205 \text{ V}$ . 4.0 mg of sample was dispersed in 1 mL of water/alcohol mixed solution with a volume ratio of 9/10 and 50  $\mu\text{L}$  Nafion solution (5%), followed by ultrasonic treatment for 30 min. Then 10  $\mu\text{L}$  of above ink was coated onto GC and dried naturally in air.  $\text{O}_2$  or  $\text{N}_2$  was saturated in electrolyte by bubbling  $\text{O}_2$  or  $\text{N}_2$  for 30 min. Linear sweep voltammetry (LSV) was collected at scan rate of  $5 \text{ mV s}^{-1}$  in  $\text{N}_2$  saturated  $0.5 \text{ mol L}^{-1} \text{ H}_2\text{SO}_4$  or  $\text{O}_2$  or  $\text{N}_2$  saturated  $1 \text{ mol L}^{-1} \text{ KOH}$ , which is corrected with  $iR$  compensation. Cyclic voltammetry (CV) was used to access double-layer capacitance, which was tested with different scan rate (40, 80, 120, 160 and  $200 \text{ mV s}^{-1}$ ) at 1.31-1.41 V (vs. RHE). Chronopotentiometry measurement was carried at the potential related to  $\sim 10 \text{ mA cm}^{-2}$ . Electrochemical impedance spectrum (EIS) was performed at -0.10 V for  $\text{N}_2$ -saturated  $1 \text{ mol L}^{-1} \text{ KOH}$ , for  $\text{N}_2$ -saturated  $0.5 \text{ mol L}^{-1} \text{ H}_2\text{SO}_4$  and -0.29 V for  $\text{O}_2$ -saturated  $1 \text{ mol L}^{-1} \text{ KOH}$ . Specific activity ( $\text{mA cm}^{-2}$ ) was based on BET surface area and calculated according to the formula: Specific Activity =  $j/(10 \times S_{\text{BET}} \times m)$ , where  $m$  fixed at  $0.2 \text{ mg cm}^{-2}$ .

### 3.2 ORR Measurements:

Electrochemical measurements were carried on a CHI 760E workstation with three-electrode system in  $\text{O}_2$ -saturated  $0.1 \text{ mol L}^{-1} \text{ KOH}$  at room temperature, with a GC RDE (5 mm in diameter) serving as work electrode, Ag/AgCl (KCl, saturated) electrode as the reference electrode and Pt wire as the counter electrode.

The pre-catalyst ink were prepared by mixing 4 mg of sample, 495  $\mu\text{L}$  of water, 500  $\mu\text{L}$  alcohol and 5  $\mu\text{L}$  Nafion solution (5%), following by ultrasonic treatment for 30 min to form homogeneous ink. Then a certain volume of above ink was coated onto GC with the loading of nonprecious pre-catalyst was  $0.40 \text{ mg cm}^{-2}$  and that of Pt/C was  $0.2 \text{ mg cm}^{-2}$ , dried naturally in air.  $\text{N}_2$  or  $\text{O}_2$  flow was bubbled for 30 min before tests to achieve  $\text{N}_2$  or  $\text{O}_2$  saturated solution. The CV tests were measured at potential window of 0.17-0.92 V with a rate of  $50 \text{ mV s}^{-1}$  in  $\text{O}_2$ - or  $\text{N}_2$ - saturated  $0.1 \text{ mol L}^{-1} \text{ KOH}$ . LSV was conducted on RDE/RRDE with sweep rate of 10

mV s<sup>-1</sup> at different rotation rates in O<sub>2</sub>-saturated 0.1 mol L<sup>-1</sup> KOH. The durability tests were performed at 0.6 V vs. RHE for 12 h in O<sub>2</sub>-saturated 0.1 mol L<sup>-1</sup> KOH. The following two equations are used to calculate the hydrogen peroxide yield (H<sub>2</sub>O<sub>2</sub>%) and the electron transfer number (n).

$$H_2O_2(\%) = 200 \times \frac{\frac{I_r}{N}}{I_d + \frac{I_r}{N}}$$

$$n = 4 \times \frac{I_d}{I_d + \frac{I_r}{N}}$$

Where I<sub>d</sub> is the disk current, I<sub>r</sub> is the ring current and N=0.37 is the ring collection efficiency.

Koutecky-Levich plot based on Koutecky-Levich equations can be used to calculate electron transfer number (n) and kinetic current density (J<sub>k</sub>).

$$\frac{1}{J} = \frac{1}{J_L} + \frac{1}{J_K} = \frac{1}{B\omega^{\frac{1}{2}}} + \frac{1}{J_K}$$

$$B = 0.62nFC_0D_0^{\frac{2}{3}}V^{-\frac{1}{6}}$$

$$J_K = nFkC_0$$

Where J, J<sub>k</sub> and J<sub>L</sub> are the measured current density, the kinetic and limiting current densities, respectively, ω is the angular velocity of the disk electrode, n is the electron transfer number, F is the Faraday constant (96485 C mol<sup>-1</sup>), C<sub>0</sub> is the bulk concentration of O<sub>2</sub> (1.2×10<sup>-6</sup>mol cm<sup>-3</sup>), D<sub>0</sub> is the diffusion coefficient of O<sub>2</sub> in 0.1 mol L<sup>-1</sup> KOH (1.9×10<sup>-5</sup>cm<sup>2</sup>s<sup>-1</sup>), and V is the kinematic viscosity of the electrolyte (0.01 cm<sup>2</sup>s<sup>-1</sup>).



#### 4. Characterizations

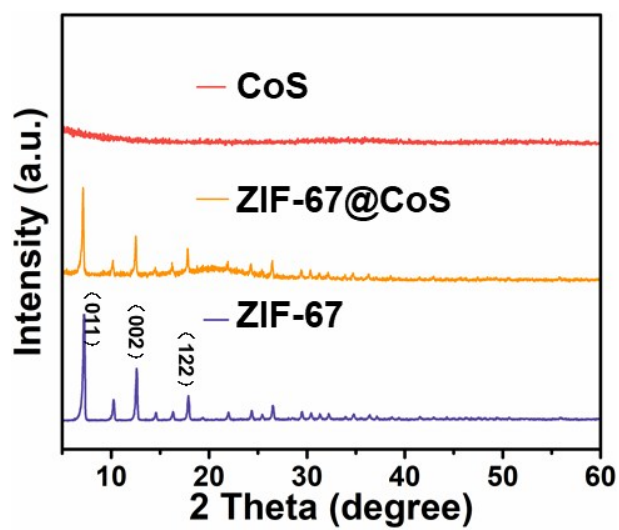

**Fig. S1** XRD patterns of ZIF-67, ZIF-67@CoS and CoS.

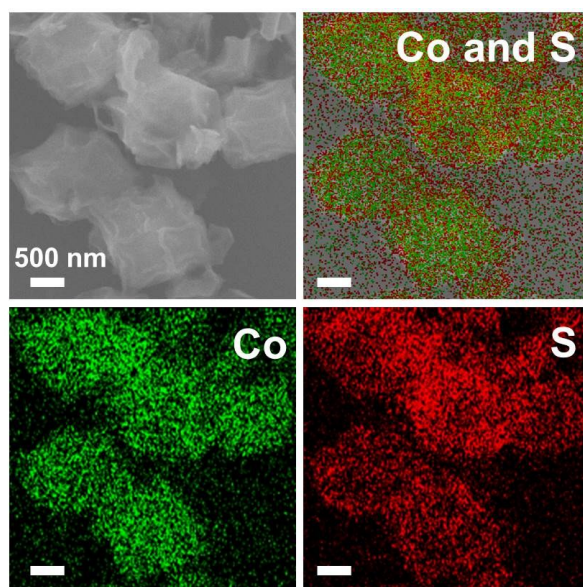

**Fig. S2** EDS mapping of Co and S elements for ZIF-67@CoS sample.

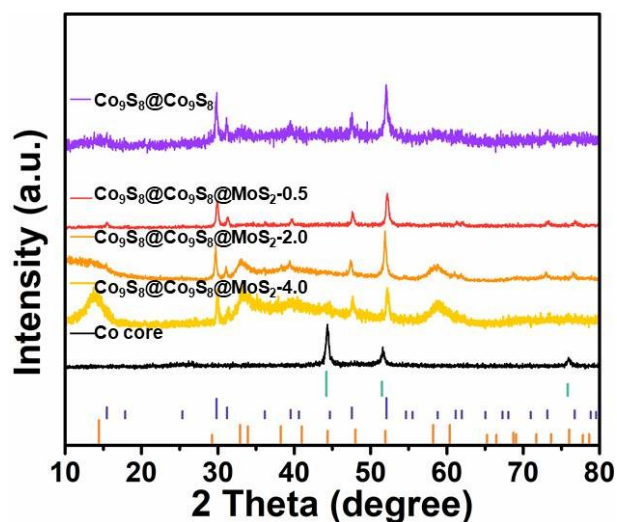

**Fig. S3** XRD patterns of  $\text{Co}_9\text{S}_8@\text{Co}_9\text{S}_8$ ,  $\text{Co}_9\text{S}_8@\text{Co}_9\text{S}_8@\text{MoS}_2\text{-0.5}$ ,  $\text{Co}_9\text{S}_8@\text{Co}_9\text{S}_8@\text{MoS}_2\text{-2.0}$ ,  $\text{Co}_9\text{S}_8@\text{Co}_9\text{S}_8@\text{MoS}_2\text{-4.0}$ ,  $\text{Co}@\text{C}$  and corresponding standard patterns of Co (JCPDS No. 15-0806) (green line),  $\text{Co}_9\text{S}_8$  (JCPDS No. 73-1442) (purple line),  $\text{MoS}_2$  (JCPDS No. 17-0744) (orange line).

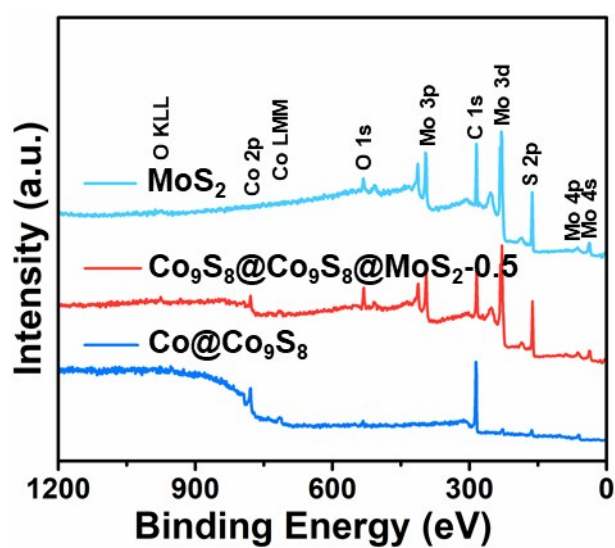

**Fig. S4** XPS survey spectra of  $\text{Co}_9\text{S}_8@\text{Co}_9\text{S}_8@\text{MoS}_2\text{-0.5}$ ,  $\text{Co}@\text{Co}_9\text{S}_8$  and  $\text{MoS}_2$ .

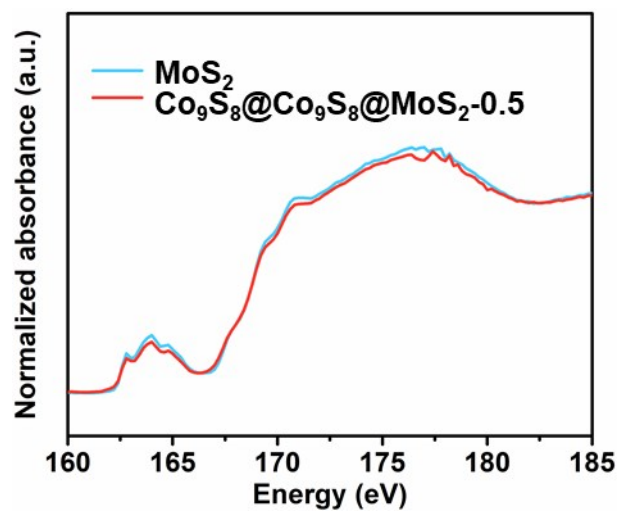

**Fig. S5** S L-edge XANES spectra of Co<sub>9</sub>S<sub>8</sub>@Co<sub>9</sub>S<sub>8</sub>@ MoS<sub>2</sub>-0.5 and MoS<sub>2</sub>.

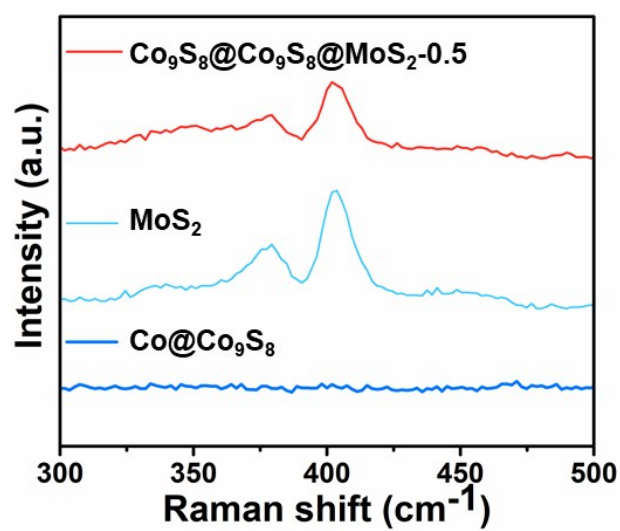

**Fig. S6** Raman spectra of Co<sub>9</sub>S<sub>8</sub>@Co<sub>9</sub>S<sub>8</sub>@ MoS<sub>2</sub>-0.5, Co@Co<sub>9</sub>S<sub>8</sub>, and MoS<sub>2</sub>.

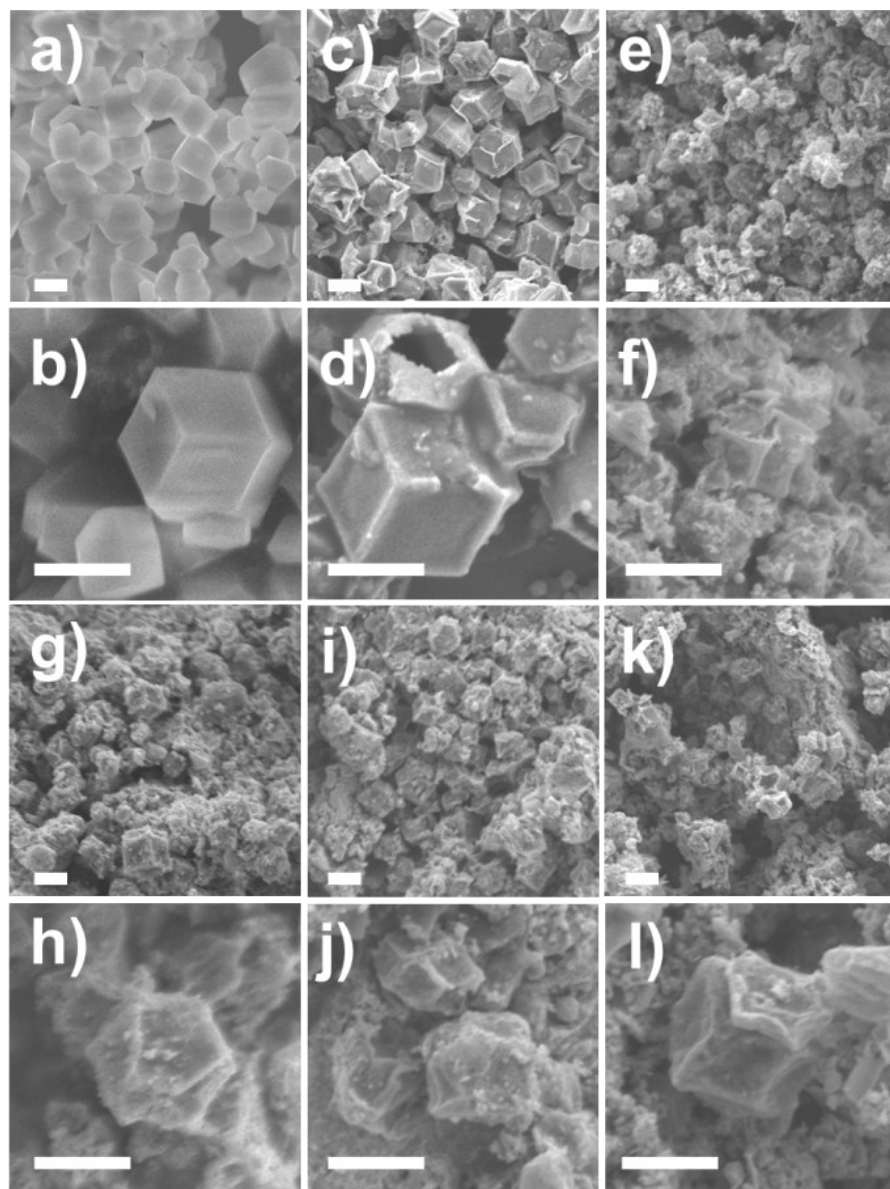

**Fig. S7** SEM images of a) and b) ZIF-67; c) and d) ZIF-67@CoS; e) and f) Co@Co<sub>9</sub>S<sub>8</sub>; g) and h) Co<sub>9</sub>S<sub>8</sub>@Co<sub>9</sub>S<sub>8</sub>@ MoS<sub>2</sub>-0.5; i) and j) Co<sub>9</sub>S<sub>8</sub>@Co<sub>9</sub>S<sub>8</sub>@ MoS<sub>2</sub>-2.0; k) and l) Co<sub>9</sub>S<sub>8</sub>@Co<sub>9</sub>S<sub>8</sub>@ MoS<sub>2</sub>-4.0 (scale bar is 200 nm).

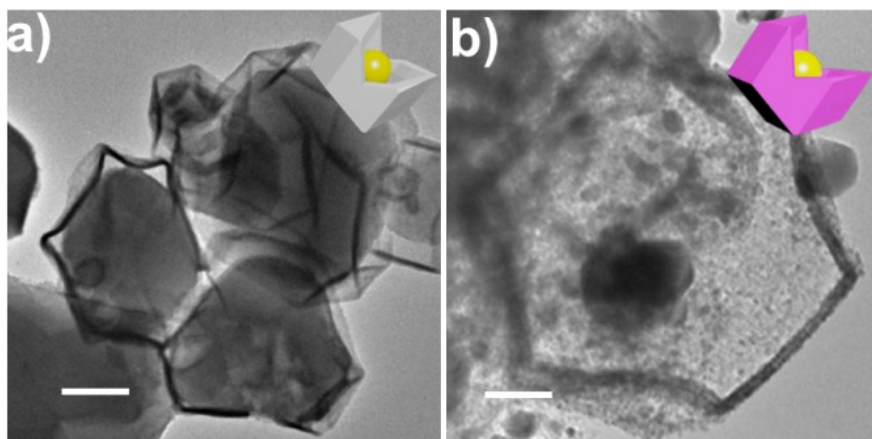

**Fig. S8** TEM images of a) ZIF-67@CoS and b) Co@Co<sub>9</sub>S<sub>8</sub> (Scale bar = 100 nm).

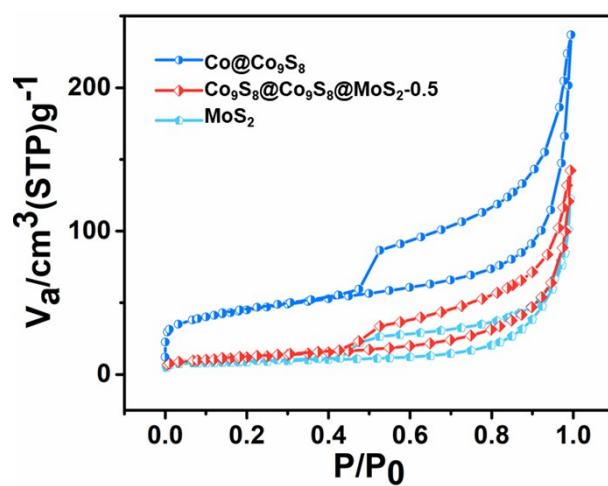

**Fig. S9** N<sub>2</sub> sorption isotherm of Co@Co<sub>9</sub>S<sub>8</sub>, Co<sub>9</sub>S<sub>8</sub>@Co<sub>9</sub>S<sub>8</sub>@ MoS<sub>2</sub>-0.5 and MoS<sub>2</sub>.

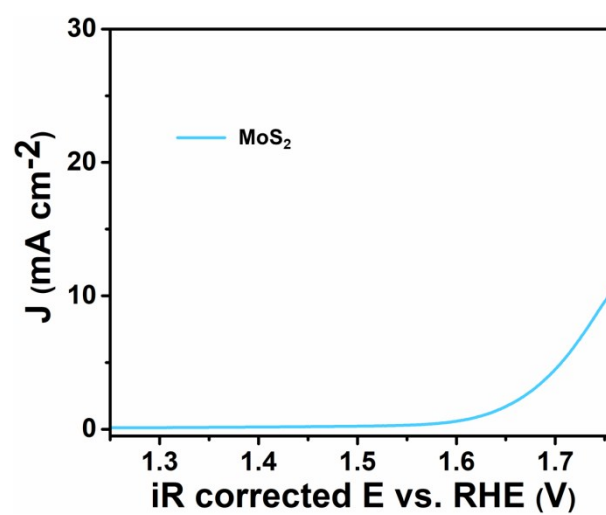

**Fig. S10** LSV curves of MoS<sub>2</sub> tested in 1 mol L<sup>-1</sup> O<sub>2</sub>-saturated KOH.

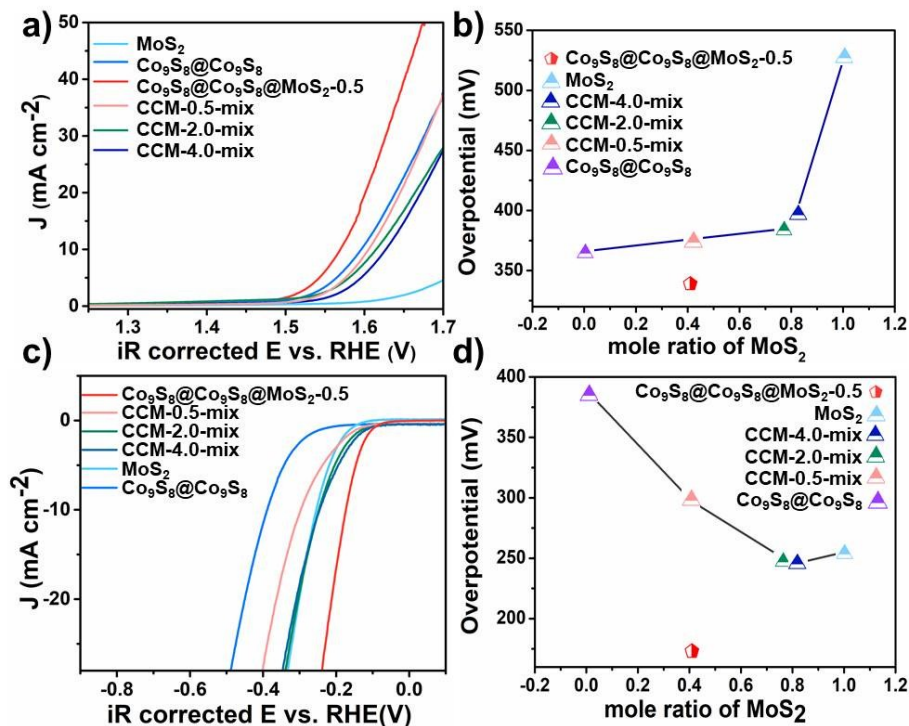

**Fig. S11** a) LSV curves of MoS<sub>2</sub>, Co<sub>9</sub>S<sub>8</sub>@Co<sub>9</sub>S<sub>8</sub>, CCM-0.5-mix, CCM-2.0-mix, CCM-4.-mix and Co<sub>9</sub>S<sub>8</sub>@Co<sub>9</sub>S<sub>8</sub>@MoS<sub>2</sub>-0.5 tested in 1 mol L<sup>-1</sup> O<sub>2</sub>-saturated KOH; b) Plot of potential vs. mole ratio of MoS<sub>2</sub> for OER; c) LSV curves of MoS<sub>2</sub>, Co<sub>9</sub>S<sub>8</sub>@Co<sub>9</sub>S<sub>8</sub>, CCM-0.5-mix, CCM-2.0-mix, CCM-4.-mix and Co<sub>9</sub>S<sub>8</sub>@Co<sub>9</sub>S<sub>8</sub>@MoS<sub>2</sub>-0.5 tested in 1 mol L<sup>-1</sup> H<sub>2</sub>-saturated KOH; d) Plot of potential vs. mole ratio of MoS<sub>2</sub> for HER.

As illustrated in Fig. S11b and S11d, the plots of overpotential vs. mole ratio of MoS<sub>2</sub> show obviously non-linear. Specifically, overpotential of MoS<sub>2</sub> for OER is 525 mV at 10 mA cm<sup>-2</sup> and gradually decreases with increasing the amount of Co<sub>9</sub>S<sub>8</sub>@Co<sub>9</sub>S<sub>8</sub> in the mixture. As a result, overpotentials of CCM-4.0-mix, CCM-2.0-mix and CCM-0.5-mix for OER are calculated to be 398, 385 and 375 mV respectively, which are gradually close to pure Co<sub>9</sub>S<sub>8</sub>@Co<sub>9</sub>S<sub>8</sub> (366 mV). Overpotential vs. mole ratio of MoS<sub>2</sub> plot for HER is similar with that for OER. Composition and synergistic effect among components could change overpotential of physical mixtures for OER and HER reaction. Therefore,

the obviously non-linear plot (potential vs. mole ratio of  $\text{MoS}_2$ ) demonstrated the presence of synergistic effect between  $\text{Co}_9\text{S}_8@\text{Co}_9\text{S}_8$  and  $\text{MoS}_2$ .

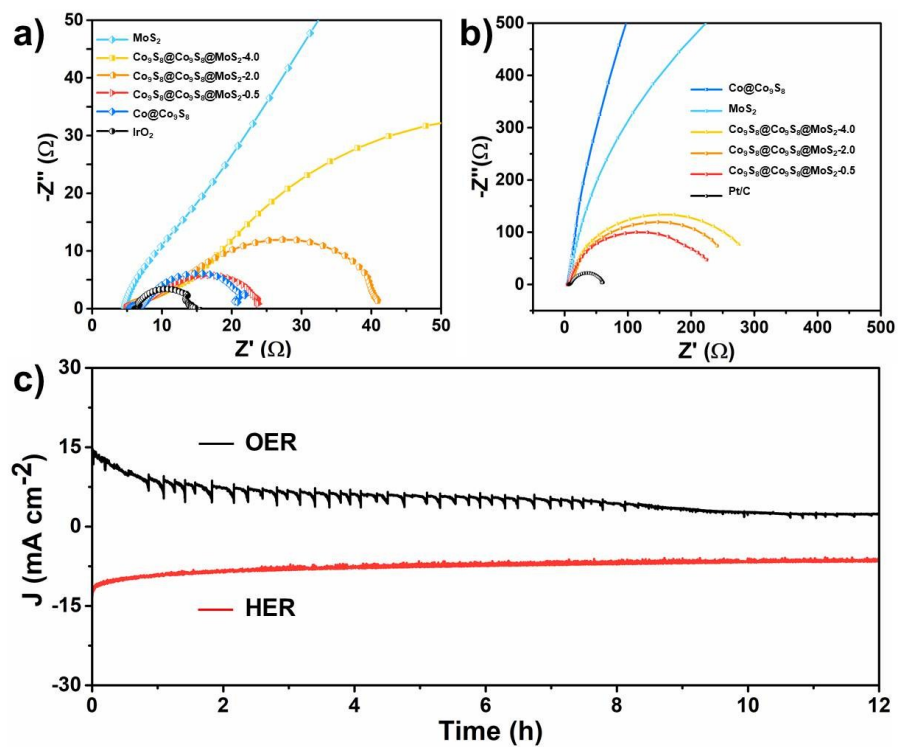

**Fig. S12** Nyquist plots of pre-catalysts a) recorded at  $-0.09$  V vs. RHE in  $\text{N}_2$ -saturated  $1 \text{ mol L}^{-1}$  KOH; b) recorded at  $1.57$  V vs. RHE in  $\text{O}_2$ -saturated  $1 \text{ mol L}^{-1}$  KOH; c) stability test for HER recorded at  $-0.20$  V and OER recorded at  $1.59$  V. The semicircular diameter at high frequencies in (a) and (b) plots are the charge transfer resistances ( $R_{\text{ct}}$ ) of samples.

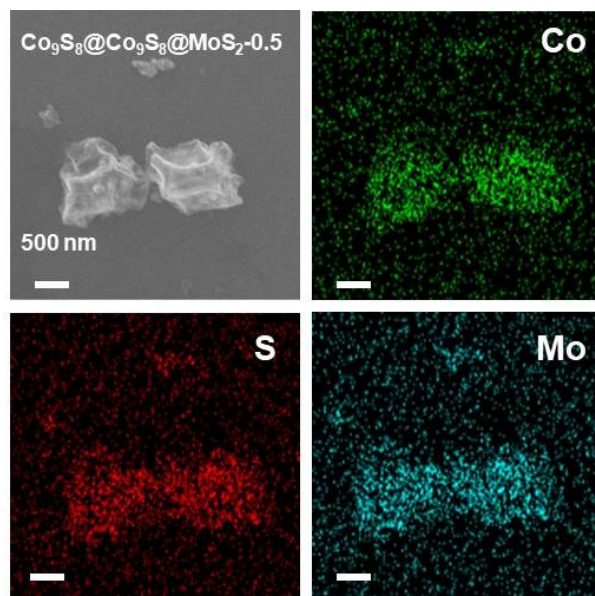

**Fig. S13** EDS mapping of Co, Mo, S elements of  $\text{Co}_9\text{S}_8@\text{Co}_9\text{S}_8@\text{MoS}_2\text{-0.5}$  after HER stability test at -0.2 V vs. RHE for 12 hours.

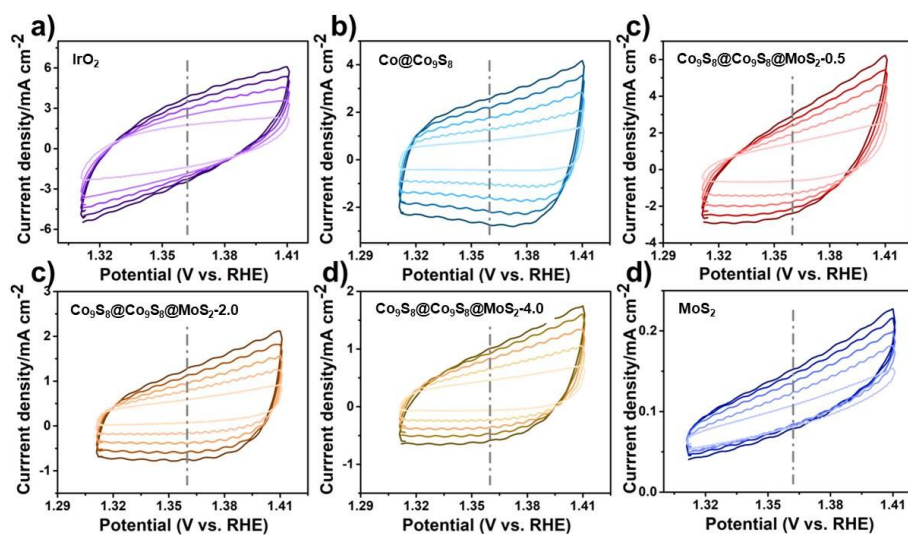

**Fig. S14** Electrochemical double layer capacitance curves of a)  $\text{IrO}_2$ ; b)  $\text{Co}@\text{Co}_9\text{S}_8$ ; c)  $\text{Co}_9\text{S}_8@\text{Co}_9\text{S}_8@\text{MoS}_2\text{-0.5}$ ; d)  $\text{Co}_9\text{S}_8@\text{Co}_9\text{S}_8@\text{MoS}_2\text{-2}$ ; e)  $\text{Co}_9\text{S}_8@\text{Co}_9\text{S}_8@\text{MoS}_2\text{-4}$  and f)  $\text{MoS}_2$  with different scan rates.

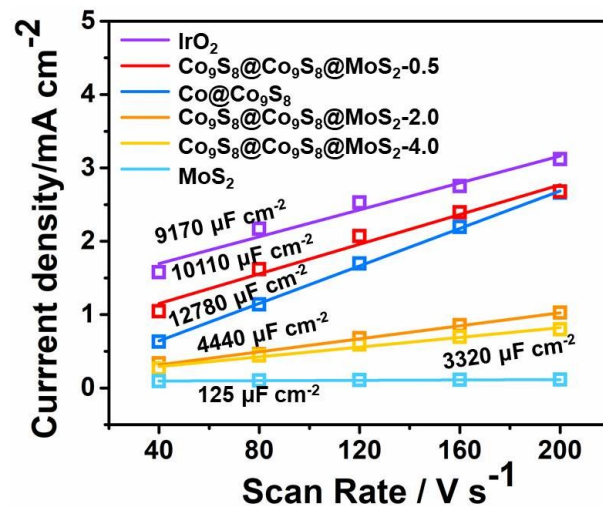

**Fig. S15** Plots of current densities at 1.36 V versus scan rates of samples.

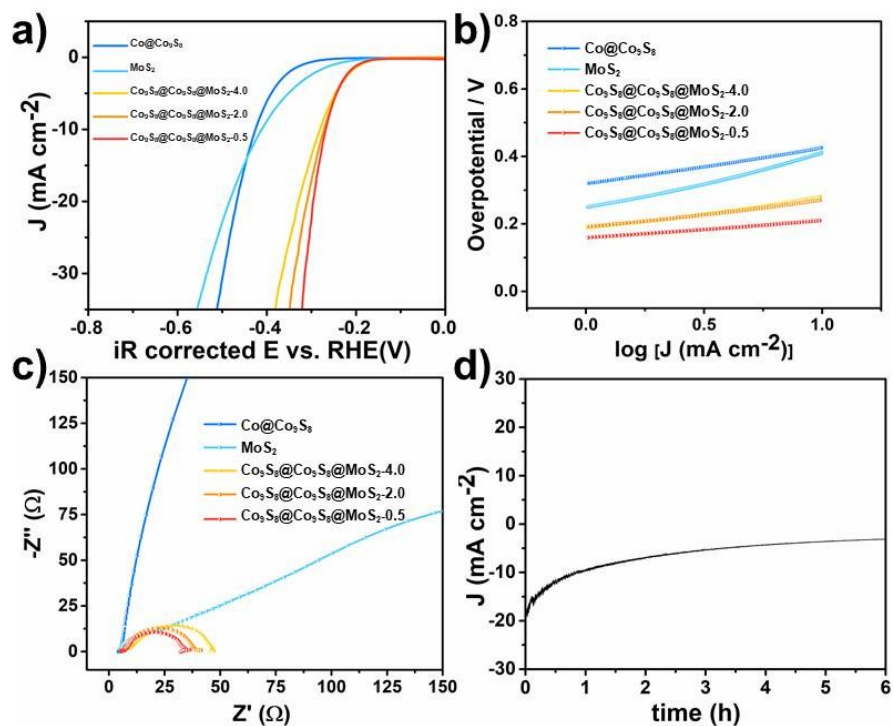

**Fig. S16** HER performance of Co@Co<sub>9</sub>S<sub>8</sub>, Co<sub>9</sub>S<sub>8</sub>@Co<sub>9</sub>S<sub>8</sub>@MoS<sub>2</sub>-0.5, Co<sub>9</sub>S<sub>8</sub>@Co<sub>9</sub>S<sub>8</sub>@MoS<sub>2</sub>-2, Co<sub>9</sub>S<sub>8</sub>@Co<sub>9</sub>S<sub>8</sub>@MoS<sub>2</sub>-4 and MoS<sub>2</sub> a) LSV curves tested in N<sub>2</sub>-saturated 0.5 mol L<sup>-1</sup> H<sub>2</sub>SO<sub>4</sub> (scan rate 5

mV s<sup>-1</sup>); b) Tafel slopes, c) Nyquist plots of pre-catalyst recorded at -0.255 V vs. RHE; and d) the current density-time curve of Co<sub>9</sub>S<sub>8</sub>@Co<sub>9</sub>S<sub>8</sub>@MoS<sub>2</sub>-0.5 tested at -0.315 V vs. RHE for 6 h.

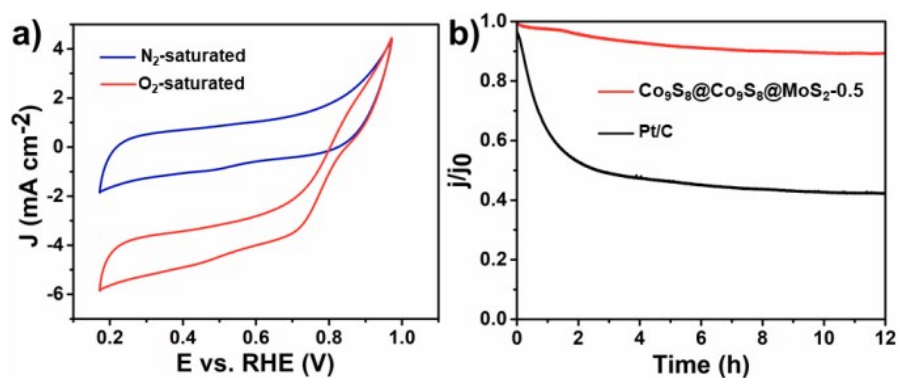

**Fig. S17** a) CVs of Co<sub>9</sub>S<sub>8</sub>@Co<sub>9</sub>S<sub>8</sub>@MoS<sub>2</sub>-0.5 in O<sub>2</sub>- and N<sub>2</sub>- saturated 0.1 mol L<sup>-1</sup> KOH; and b) The i-t curves of Co<sub>9</sub>S<sub>8</sub>@Co<sub>9</sub>S<sub>8</sub>@MoS<sub>2</sub>-0.5 and Pt/C tested at 0.6 V for 12 hours.

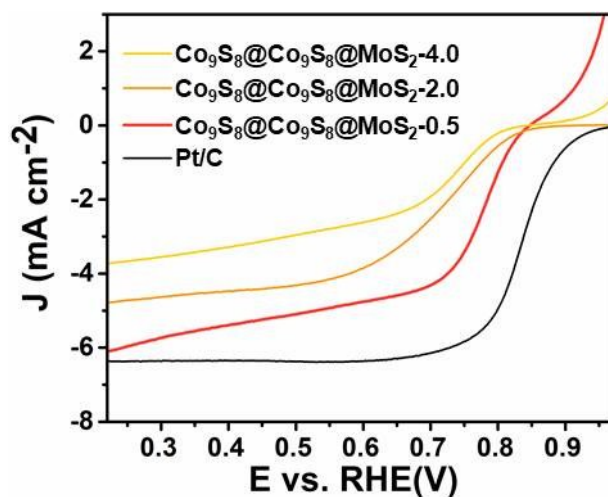

**Fig. S18** RDE polarization curves of Co<sub>9</sub>S<sub>8</sub>@Co<sub>9</sub>S<sub>8</sub>@MoS<sub>2</sub>-0.5, Co<sub>9</sub>S<sub>8</sub>@Co<sub>9</sub>S<sub>8</sub>@MoS<sub>2</sub>-2.0, Co<sub>9</sub>S<sub>8</sub>@Co<sub>9</sub>S<sub>8</sub>@MoS<sub>2</sub>-4.0 and Pt/C tested in O<sub>2</sub>-saturated 0.1 mol L<sup>-1</sup> KOH with a sweep rate of 10 mV s<sup>-1</sup> at 1600 rpm.

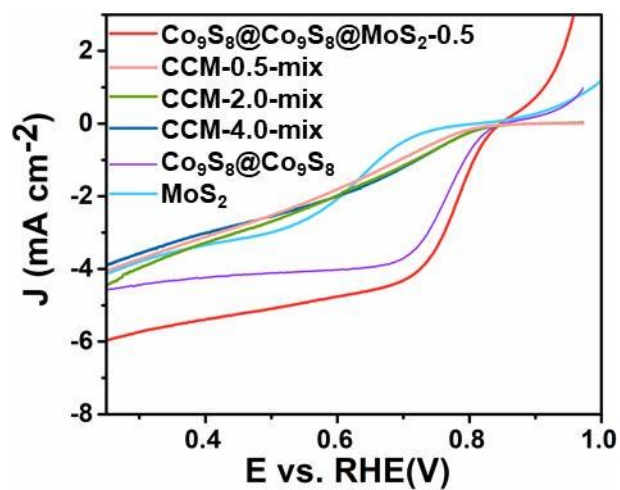

**Fig. S19** RDE polarization curves of CCM-0.5-mix, CCM-2.0-mix, CCM-4.0-mix and Pt/C tested in O<sub>2</sub>-saturated 0.1 mol L<sup>-1</sup> KOH with a sweep rate of 10 mV s<sup>-1</sup> at 1600 rpm.

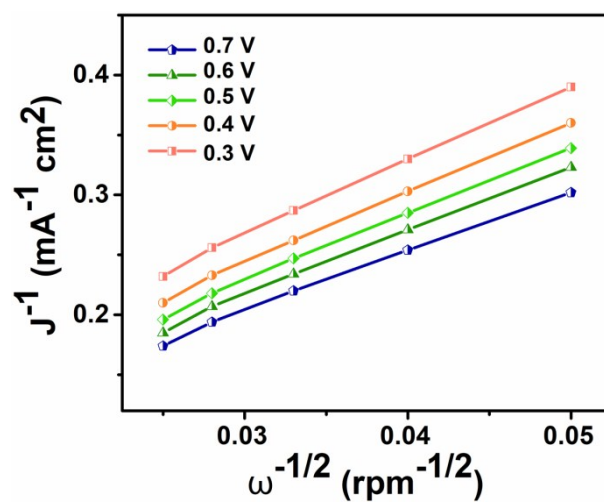

**Fig. S20** Koutecky-Levich plots ( $J^{-1}$  versus  $\omega^{-0.5}$ ) at different potentials.

**Table S1.** Composition of  $\text{Co}_9\text{S}_8@\text{Co}_9\text{S}_8@\text{MoS}_2\text{-0.5}$ ,  $\text{Co}_9\text{S}_8@\text{Co}_9\text{S}_8@\text{MoS}_2\text{-2.0}$  and  $\text{Co}_9\text{S}_8@\text{Co}_9\text{S}_8@\text{MoS}_2\text{-4.0}$  characterized by X-ray fluorescence.

| Sample                                                                | Atomic ratio of Co/Mo | Mole ratio of $\text{MoS}_2$ to $\text{Co}_9\text{S}_8$ |
|-----------------------------------------------------------------------|-----------------------|---------------------------------------------------------|
| $\text{Co}_9\text{S}_8@\text{Co}_9\text{S}_8@\text{MoS}_2\text{-0.5}$ | 1/0.0767              | 0.41                                                    |
| $\text{Co}_9\text{S}_8@\text{Co}_9\text{S}_8@\text{MoS}_2\text{-2.0}$ | 1/0.401               | 0.78                                                    |
| $\text{Co}_9\text{S}_8@\text{Co}_9\text{S}_8@\text{MoS}_2\text{-4.0}$ | 1/0.491               | 0.82                                                    |

**Table S2.** C wt.%, N wt.% and H wt.% obtained by CHNS elemental analysis

| Samples                                                               | C wt.% | N wt.% | H wt.% |
|-----------------------------------------------------------------------|--------|--------|--------|
| $\text{Co}_9\text{S}_8@\text{Co}_9\text{S}_8@\text{MoS}_2\text{-0.5}$ | 6.80   | 0.16   | 3.07   |
| $\text{Co}_9\text{S}_8@\text{Co}_9\text{S}_8@\text{MoS}_2\text{-2.0}$ | 4.55   | 0.15   | 2.03   |
| $\text{Co}_9\text{S}_8@\text{Co}_9\text{S}_8@\text{MoS}_2\text{-4.0}$ | 3.53   | 0.09   | 2.11   |
